# Supplementary material for: Cytotoxicity of fac-Mn(CO)3 complexes with a bidentate quinoline ligand towards triple negative breast cancer
Source: Royal Society of Chemistry journal article supplement (doi:10.1039/d2dt01938h), 2022-01-01
Supplement: d2dt01938h1.pdf [file d2dt01938h1.pdf]

## Supporting Information

### **Cytotoxicity of *fac*-Mn(CO)<sub>3</sub> complexes with a bidentate quinoline ligand towards triple negative breast cancer**

Danira A. Habashy,<sup>a</sup> Rabaa M. Khaled,<sup>b</sup> Amr Y. Ahmed,<sup>a</sup> Krzysztof Radacki,<sup>c</sup> Salma K. Ahmed,<sup>d</sup>  
Engy Khaled,<sup>d</sup> Hana Magdy,<sup>d</sup> Alaa Zeinhom,<sup>d</sup> and Ahmed M. Mansour,<sup>\*b</sup>

---

<sup>a.</sup> *Department of Pharmacology, Toxicology and Clinical Pharmacy, German University in Cairo, New Cairo, Egypt.*

<sup>b.</sup> *Department of Chemistry, Faculty of Science, Cairo University, Gamma Street, Giza, Cairo 12613, Egypt. E-mail: [mansour@sci.cu.edu.eg](mailto:mansour@sci.cu.edu.eg); [inorganic\\_am@yahoo.com](mailto:inorganic_am@yahoo.com)*

<sup>c.</sup> *Institut für Anorganische Chemie, Julius-Maximilians-Universität Würzburg, Am Hubland, D-97074 Würzburg, Germany.*

<sup>d.</sup> *Department of Biotechnology, Faculty of Science, Cairo University, Gamma Street, Giza, Cairo 12613, Egypt.*

**Section A: Experimental**

**Section B: Supplementary figures**

## Section A: Experimental

### Materials and instruments

Quinoline-2-carboxaldehyde, 8-aminoquinoline, bromo penta-carbonyl manganese(I) and organic solvents were obtained from commercial resources and used as received. Advion compact mass spectrometer was used for recording positive and negative mode electrospray ionization mass spectra. A Specord 210 Plus spectrophotometer was utilized for recording electronic absorption spectra. IR spectra of solid complexes were recorded on a Bruker Alpha-E instrument. <sup>1</sup>H NMR analysis was performed using a Bruker Avance 400. The elemental analyses were determined on an automatic CHNS analyzer, Vario EL III Elementar.

### Synthesis

To a flat-bottomed flask charged with either 8-aminoquinoline (0.34 mmol; 54 mg) or quinoline-2-carboxaldehyde (0.36 mmol; 110 mg) and bromo penta-carbonyl manganese(I) (0.38 mmol; 105 mg), *n*-hexane (15 mL) was added. Under the dark conditions, the flasks were heated to reflux for 45 minutes. Reddish brown (**A**) and yellow (**B**) precipitates were formed on hot. The products were collected, washed with *n*-hexane, and then dried. **A**: Yield: 76% (92 mg, 0.27 mmol). IR (ATR):  $\nu = 2021$  (vs, C≡O), 1929 (sh, C≡O), 1906 (vs, C≡O), 1593, 1550, 1394, 1249 cm<sup>-1</sup>. ESI-MS (positive mode, acetone):  $m/z = 298.8$  {M-Br}<sup>+</sup> and 211.9 {M-Br-3CO}<sup>+</sup> (M = molecular mass). C<sub>13</sub>H<sub>7</sub>BrMnNO<sub>4</sub>·2H<sub>2</sub>O: C 37.89, H 2.69, N 3.40 found: C 38.06, H 2.31, N 3.68. **B**: Yield: 74.4% (28.1 mg, 0.26 mmol). IR (ATR):  $\nu = 2021$  (vs, C≡O), 1932 (sh, C≡O), 1899 (vs, C≡O), 1565, 1507, 822 cm<sup>-1</sup>. <sup>1</sup>H NMR (CD<sub>3</sub>COCD<sub>3</sub>, 400.40 MHz):  $\delta = 9.46$  (d, <sup>3</sup>J<sub>H,H</sub> = 4.89 Hz, 1H, Q-H2), 8.60 (d, <sup>3</sup>J<sub>H,H</sub> = 8.43 Hz, 1H, Q-H4), 8.03 (d, <sup>3</sup>J<sub>H,H</sub> = 7.83 Hz, 1H, Q-H5), 7.99 (d, <sup>3</sup>J<sub>H,H</sub> = 6.60 Hz, 1H, Q-H7), 7.79 (m, 1H, Q-H3), 7.75 (d, <sup>3</sup>J<sub>H,H</sub> = 7.70 Hz, 1H, Q-H6), 7.10 (d, <sup>2</sup>J<sub>H,H</sub> = 12.59 Hz, 1H, NH<sub>2</sub>), and 5.46 (d, <sup>2</sup>J<sub>H,H</sub> = 12.10 Hz, 1H, NH<sub>2</sub>) ppm. ESI-MS (positive mode, acetone):  $m/z = 360.8$  {M-H}<sup>-</sup> and 198.8 {M-Br-3CO}<sup>+</sup>. C<sub>12</sub>H<sub>8</sub>BrMnN<sub>2</sub>O<sub>3</sub>·0.5H<sub>2</sub>O: C 38.82, H 2.42, N 7.54, found: C 39.11, H 2.52, N 7.58.

### Single crystal X-ray diffraction analysis

Slow evaporation of solution of **B** in acetone over two weeks offered orange crystals suitable for X-ray crystallographic analysis. The diffraction data of **B** were acquired at 100 K using a RIGAKU XtaLAB Synergy-R diffractometer equipped with a semiconductor HPA-detector (HyPix-6000) and multi-layer mirror mono-chromated *Cu-K $\alpha$*  radiation. The intrinsic phasing approach (SHELXT programme) was used to solve the structure of the manganese tricarbonyl complex (**B**),<sup>1</sup> which was then improved using the SHELXL programme and the SHELXLE graphical user interface.<sup>2</sup> Non-hydrogen atoms were refined using an anisotropic approximation, whereas hydrogen atoms were 'riding' on idealised locations. Crystal data for **B**: C<sub>12</sub>H<sub>8</sub>BrMnN<sub>2</sub>O<sub>3</sub>, *M<sub>r</sub>* = 363.05, orange block, 0.289 × 0.241 × 0.071 mm<sup>3</sup>, monoclinic space group *C2/c*, *a* = 12.39880(10) Å, *b* = 17.17570(10) Å, *c* = 12.32030(10) Å,  $\alpha = 90^\circ$ ,  $\beta = 92.7500(10)^\circ$ ,  $\gamma = 90^\circ$ , *V* = 2620.69(3) Å<sup>3</sup>, *Z* = 8,  $\rho_{\text{calcd}} = 1.840$  g·cm<sup>-3</sup>,  $\mu = 11.827$  mm<sup>-1</sup>, *F*(000) = 1424, *T* = 100.00(10) K, *R*<sub>1</sub> = 0.0476, *wR*<sub>2</sub> = 0.1282, 2596 independent reflections [ $2\theta \leq 147.206^\circ$ ] and 172 parameters. CCDC 2180129 (**B**) contains the supplementary crystallographic data for this work. These data can be obtained free of charge via [www.ccdc.cam.ac.uk/ data\\_request/cif](http://www.ccdc.cam.ac.uk/data_request/cif) (Cambridge Crystallographic Data Centre).

### DFT/TDDFT calculations

Ground state geometry optimization of metal carbonyl complexes was carried out using Gaussian03,<sup>3</sup> with a Becke 3-parameter (exchange) Lee–Yang–Parr functional<sup>4,5</sup> and LANL2DZ basis set.<sup>6,7</sup> The local minimum structures of metal carbonyls were validated as minimum on the potential energy surface by computing vibrational modes. There were no phantom vibrations here. Time-dependent density functional theory calculations were done at CAM-B3LYP<sup>8</sup> /LANL2DZ level of theory, including the SMD solvation model.<sup>9</sup> Visualization of the electronic spectra and frontier molecular orbitals was achieved using Gaussview03.<sup>10</sup>

### **Myoglobin assay**

By monitoring the conversion of Mb into Mb-CO species, the number of CO equivalents emitted by PhotoCORMs (**A** and **B**) was spectrophotometrically quantified by myoglobin assay.<sup>11, 12</sup> A buffered solution of standardised horse skeletal muscle myoglobin (Sigma-Aldrich) (0.1 M phosphate-buffered saline, pH = 7.4, 890  $\mu$ L) was reduced in a quartz cuvette by adding 100  $\mu$ L sodium dithionite solution. After that, 10  $\mu$ L of CORMs in pure DMSO was added to complete the volume (1 mL) of the quartz cuvette. The stock solution concentrations were chosen to yield a final mixture of 10  $\mu$ M dithionite, 60  $\mu$ M myoglobin, and 10  $\mu$ M CORM. 468 nm custom-built LED light source was used for illumination (Kingbright Elec. Co., 5000 mcd, part. no. BL0106-15-299). The photo flow of the light source ( $1.25 \times 10^{-9}$  Einstein  $s^{-1}$ ) was determined using the ferrioxalate actinometry test. The sealed cuvette was likewise positioned at a distance of 3 cm from the lamp, with the illumination interrupted at regular intervals to acquire UV/Vis spectra on Specord 210 Plus spectrophotometer until no more changes in the Q-band region were seen. Data was evaluated as described previously.<sup>11, 12</sup>

### **Biological activity**

#### **Materials and methods**

**Cell culture:** The human triple negative breast cancer cell line (MDA-MB-231) and Human embryonic Kidney cells (HEK 283T) were obtained from VACSRA, Egypt, and maintained in Dulbecco's modified Eagle's medium (DMEM) and (RPMI 1640) respectively, supplemented with 4.5 g/L glucose, 4 mmol/L l-glutamine, 10% fetal bovine serum (FBS), and 10 U of penicillin and 10 mg  $L^{-1}$  of streptomycin as a monolayer culture at 37 °C in 5% CO<sub>2</sub> atmosphere. Cells were sub-cultured routinely to maintain the cells in a healthy condition.

#### **Cell viability assay:**

##### **A. Evaluation of the cytotoxicity of PhotoCORMs (A and B)**

The cytotoxicity of the two visible-induced PhotoCORMs (**A** and **B**) against MDA-MB-231 cells and HEK 293T was investigated using a 3-(4,5-dimethylthiazol-2-yl)-2,5-tetrazolium bromide (MTT) assay under both dark and illumination conditions. Cells were seeded into a 96-well plate at a density of 15,000 cells per well and incubated overnight. The rest of the MTT assay was performed in the dark to avoid the photo decomposition of compounds (**A** and **B**), unless otherwise mentioned. Cells were treated with different concentrations of the investigated complexes as follows: 0, 5, 10, 25 and 50  $\mu$ M, and then incubated for 18 h to increase the uptake by the cells. After that, the media was removed, new media was added to the cells, and they were incubated for another 45 minutes. The cells were then exposed to light for 40

minutes at a distance of 3 cm. To test the effect of light, another plate was made under comparable conditions and then left in the dark as a control. The two plates were re-incubated for an additional 18 h. Afterward, media was removed, and cells were washed with PBS and MTT solution ( $0.5 \text{ mg ml}^{-1}$ ) was added on the cells. After 4 h of incubation, the MTT was replaced with  $100 \mu\text{L}$  of DMSO to dissolve the generated formazan crystals. After shaking the plates for 15–20 min, the absorbance was recorded using a Wallac 1420 Victor2 Multilabel Counter (Perkin Elmer Inc., Waltham, MA, USA) at 490 nm. The relative cell viability was determined by normalizing the absorbance of the treated cells to untreated cells. The inhibitory concentration ( $\text{IC}_{50}$ ), at which 50% of the cells are killed was determined by non-regression analysis of the dose–response curve using Graph Pad Prism software.

## **B. Evaluation of the cytotoxicity of complex B in combination with Paclitaxel**

The cytotoxicity of the synthesized tricarbonyl Mn(I) complexes, with and without illumination, against MDA-MB-231 cells was investigated using a 3-(4,5-dimethylthiazol-2-yl)-2,5-tetrazolium bromide (MTT) assay. Cells were seeded into a 96-well plate at a density of 15000 cells per well and incubated overnight. The rest of the MTT assay was performed in the dark, unless otherwise mentioned. Cells were treated with the chemotherapeutic agent alone (Paclitaxel) according to the following concentrations (0, 1, 3, 10, and 30 nM) or treated with complex B alone according to the following concentrations (0, 5, 10, 25 and 50  $\mu\text{M}$ ) or co-treated with both the complex B at different concentrations with the highest concentration of Paclitaxel (30 nM) and then incubated for 48 h to increase the uptake by the cells. After that, media were removed, and fresh media were added to the cells and then they were incubated again for 45 min. Next, the cells were exposed to light at a distance of 3 cm for 40 min. Another plate was prepared under similar conditions and then kept in the dark as a control to investigate the effects of light. The two plates were re-incubated for an additional 18 h. Afterward, media was removed, and cells were washed with PBS and MTT solution ( $0.5 \text{ mg ml}^{-1}$ ) was added on the cells. After 4 h of incubation, the MTT was replaced with  $100 \mu\text{L}$  of DMSO to dissolve the formed formazan crystals. After shaking the plates for 15–20 min, the absorbance was recorded using a Wallac 1420 Victor2 Multilabel Counter (Perkin Elmer Inc., Waltham, MA, USA) at 490 nm. The relative cell viability was determined by normalizing the absorbance of the treated cells to untreated cells.

### **Statistical Analysis**

All experiments were performed in triplicates and repeated at least three times. All data are presented as the mean  $\pm$  standard error of the mean. All analyses were performed using GraphPad Prism Software.  $P < 0.05$  was considered statistically significant with One-way ANOVA test. \*\*\*= $p < 0.001$ , \*\*= $p < 0.01$ , \*= $p < 0.05$

|                 |                                                                                                                                                                                                                                                                                                                                                                                                                                                                                                                                                                                                                                                                                                         |            |
|-----------------|---------------------------------------------------------------------------------------------------------------------------------------------------------------------------------------------------------------------------------------------------------------------------------------------------------------------------------------------------------------------------------------------------------------------------------------------------------------------------------------------------------------------------------------------------------------------------------------------------------------------------------------------------------------------------------------------------------|------------|
| <b>Fig. S1</b>  | IR spectra of <i>fac</i> -[MnBr(CO) <sub>3</sub> L] complexes, a) L = quinoline-2-carboxaldehyde ( <b>A</b> ) and b) L = 8-amino quinoline ( <b>B</b> )                                                                                                                                                                                                                                                                                                                                                                                                                                                                                                                                                 | <b>S6</b>  |
| <b>Fig. S2</b>  | <sup>1</sup> H NMR spectrum (in CD <sub>3</sub> COCD <sub>3</sub> ) of complex <b>B</b> .                                                                                                                                                                                                                                                                                                                                                                                                                                                                                                                                                                                                               | <b>S7</b>  |
| <b>Table S1</b> | Single-crystal X-ray diffraction data of complex <b>B</b> .                                                                                                                                                                                                                                                                                                                                                                                                                                                                                                                                                                                                                                             | <b>S8</b>  |
| <b>Fig. S3</b>  | Electronic absorption spectra of complex <b>A</b> in different solvents.                                                                                                                                                                                                                                                                                                                                                                                                                                                                                                                                                                                                                                | <b>S9</b>  |
| <b>Fig. S4</b>  | The local minimum structures of a) <b>A</b> and b) <b>B</b> .                                                                                                                                                                                                                                                                                                                                                                                                                                                                                                                                                                                                                                           | <b>S10</b> |
| <b>Table S2</b> | Selected experimental bond lengths (Å) and angles (°) of complexes <b>A</b> and <b>B</b> .                                                                                                                                                                                                                                                                                                                                                                                                                                                                                                                                                                                                              | <b>S11</b> |
| <b>Fig. S5</b>  | TD-DFT calculated spectra of complexes <b>A</b> and <b>B</b> , calculated at a) B3LYP/LANL2DZ and b) CAM-B3LYP/LANL2DZ level of theories.                                                                                                                                                                                                                                                                                                                                                                                                                                                                                                                                                               | <b>S12</b> |
| <b>Table S3</b> | Computed excitation energies (eV), electronic transition configurations and oscillator strengths ( <i>f</i> ) of compounds <b>A</b> and <b>B</b> (selected, <i>f</i> > 0.001).                                                                                                                                                                                                                                                                                                                                                                                                                                                                                                                          | <b>S13</b> |
| <b>Fig. S6</b>  | The electronic transition at 352 nm and frontier molecular orbitals of complex <b>A</b> calculated at CAM-B3LYP levels of theory.                                                                                                                                                                                                                                                                                                                                                                                                                                                                                                                                                                       | <b>S15</b> |
| <b>Fig. S7</b>  | Electronic absorption changes upon incubation of complexes a) <b>A</b> (0.25 mM) and b) <b>B</b> (0.24 mM) in DMSO/H <sub>2</sub> O mixture in the dark for 16 h.                                                                                                                                                                                                                                                                                                                                                                                                                                                                                                                                       | <b>S16</b> |
| <b>Fig. S8</b>  | Electronic absorption changes upon incubation of complexes a) <b>A</b> (0.25 mM) and b) <b>B</b> (0.24 mM) in an excess of sodium bromide in the dark for 16 h.                                                                                                                                                                                                                                                                                                                                                                                                                                                                                                                                         | <b>S17</b> |
| <b>Fig. S9</b>  | UV/Vis spectral changes of complex <b>A</b> (0.25 mM in DMSO-H <sub>2</sub> O mixture) upon photolysis at 468 nm with increasing illumination time (0–210 s).                                                                                                                                                                                                                                                                                                                                                                                                                                                                                                                                           | <b>S18</b> |
| <b>Fig. S10</b> | Electronic absorption changes upon incubation of complexes a) <b>A</b> (0.25 mM) and b) <b>B</b> (0.24 mM) in sodium dithionite in the dark for 16 h.                                                                                                                                                                                                                                                                                                                                                                                                                                                                                                                                                   | <b>S19</b> |
| <b>Fig. S11</b> | UV/vis spectral changes in the Q-band region of myoglobin (60 μM in 0.1 PBS at pH 7.4) with sodium dithionite (10 mM) and complex <b>A</b> (10 μM) under a dinitrogen atmosphere upon photolysis at 468 nm.                                                                                                                                                                                                                                                                                                                                                                                                                                                                                             | <b>S20</b> |
| <b>Fig. S12</b> | Comparison of cell viability of HEK 293T and MDA-MB-231 treated with different concentrations of compound <b>A</b> under both dark and illumination conditions.                                                                                                                                                                                                                                                                                                                                                                                                                                                                                                                                         | <b>S21</b> |
| <b>Fig. S13</b> | Comparison of cell viability of MDA-MB-231 treated with (A) paclitaxel alone, and (B) compound <b>B</b> alone, in different concentrations. (C, D, E, F) co-treatment of MDA-MB-231 cells with paclitaxel (30 nM) and compound <b>B</b> in different concentrations (5 μM, 10 μM, 25 μM and 50 μM) respectively, under dark conditions. Asterisks on the bar itself show results of statistically significant difference when compared to control group, while the ones indicated by line with asterisks show statistically significant difference compared to different groups as indicated. P<0.05 was considered statistically significant with One-way ANOVA test. ***=p<0.001, **=p<0.01, *=p<0.05 | <b>S22</b> |
|                 | References                                                                                                                                                                                                                                                                                                                                                                                                                                                                                                                                                                                                                                                                                              | <b>S23</b> |

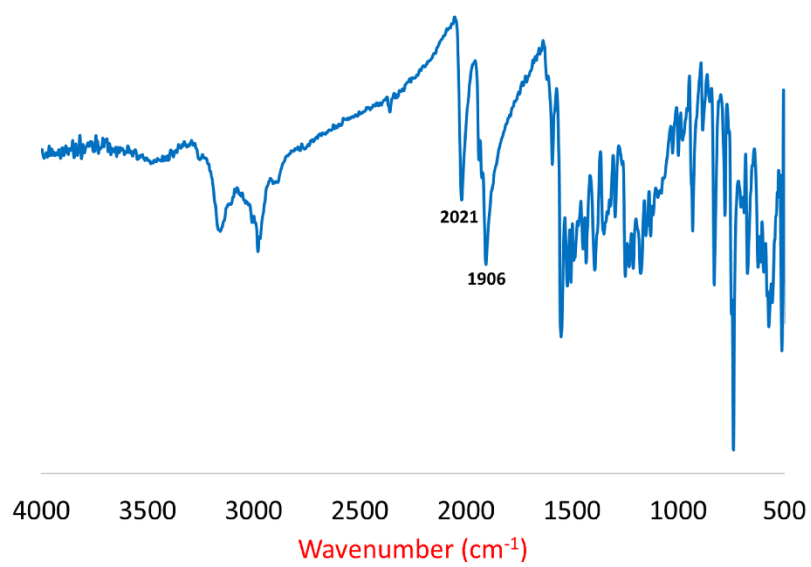

a)

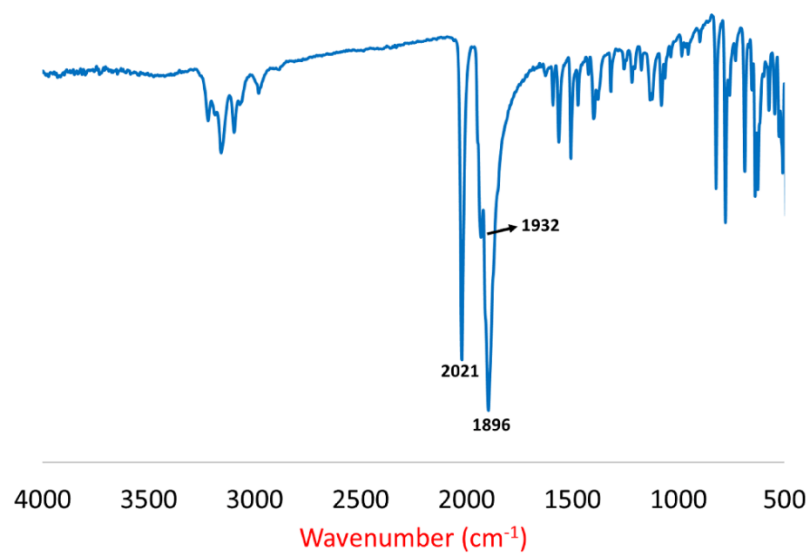

b)

**Fig. S1** IR spectra of *fac*-[MnBr(CO)<sub>3</sub>L] complexes, a) L = quinoline-2-carboxaldehyde (**A**) and b) L = 8-amino quinoline (**B**).

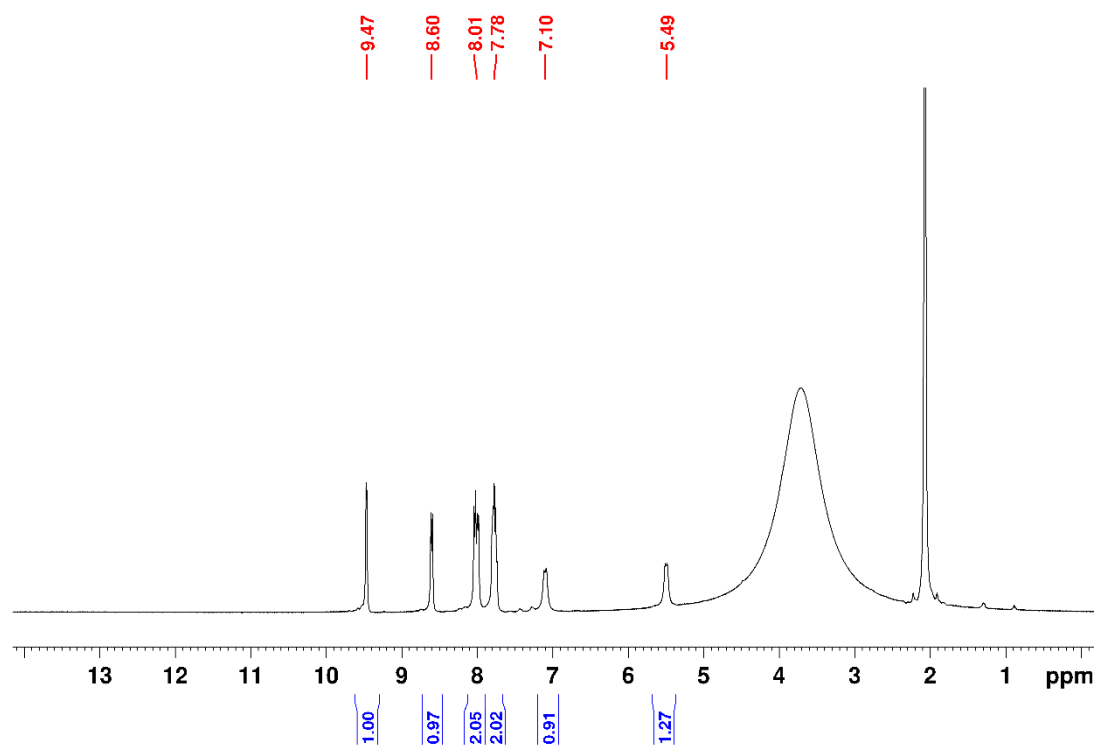

**Fig. S2**  $^1\text{H}$  NMR spectrum (in  $\text{CD}_3\text{COCD}_3$ ) of complex **B**.

**Table S1** Single-crystal X-ray diffraction data of complex **B**.

| Data                                                           | <b>B</b>                                                         |
|----------------------------------------------------------------|------------------------------------------------------------------|
| Empirical formula                                              | C <sub>12</sub> H <sub>8</sub> BrMnN <sub>2</sub> O <sub>3</sub> |
| Formula weight (g·mol <sup>-1</sup> )                          | 363.05                                                           |
| Temperature (K)                                                | 100.00(10)                                                       |
| Radiation, λ (Å)                                               | Cu <sub>Kα</sub> , 1.54184                                       |
| Crystal system                                                 | orthorhombic                                                     |
| Space group                                                    | <i>Pbca</i>                                                      |
| <i>Unit cell dimensions</i>                                    |                                                                  |
| <i>a</i> (Å)                                                   | 17.7147(2)                                                       |
| <i>b</i> (Å)                                                   | 12.0111(2)                                                       |
| <i>c</i> (Å)                                                   | 25.1224(3)                                                       |
| α (°)                                                          | 90                                                               |
| β (°)                                                          | 90                                                               |
| γ (°)                                                          | 90                                                               |
| Volume (Å <sup>3</sup> )                                       | 5345.37(13)                                                      |
| <i>Z</i>                                                       | 16                                                               |
| Calculated density (Mg·m <sup>-3</sup> )                       | 1.805                                                            |
| Absorption coefficient (mm <sup>-1</sup> )                     | 11.596                                                           |
| <i>F</i> (000)                                                 | 2848                                                             |
| Theta range for collection                                     | 3.519 to 73.763°                                                 |
| Reflections collected                                          | 30471                                                            |
| Independent reflections                                        | 5342                                                             |
| Minimum/maximum transmission                                   | 0.195/0.753                                                      |
| Refinement method                                              | Full-matrix least-squares on <i>F</i> <sup>2</sup>               |
| Data / parameters / restraints                                 | 5342 / 343 / 0                                                   |
| Goodness-of-fit on <i>F</i> <sup>2</sup>                       | 1.101                                                            |
| Final R indices [ <i>I</i> > 2σ( <i>I</i> )]                   | R <sub>1</sub> = 0.0277, wR <sub>2</sub> = 0.0691                |
| R indices (all data)                                           | R <sub>1</sub> = 0.0327, wR <sub>2</sub> = 0.0709                |
| Maximum/minimum residual electron density (e·Å <sup>-3</sup> ) | 0.716 / -0.523                                                   |



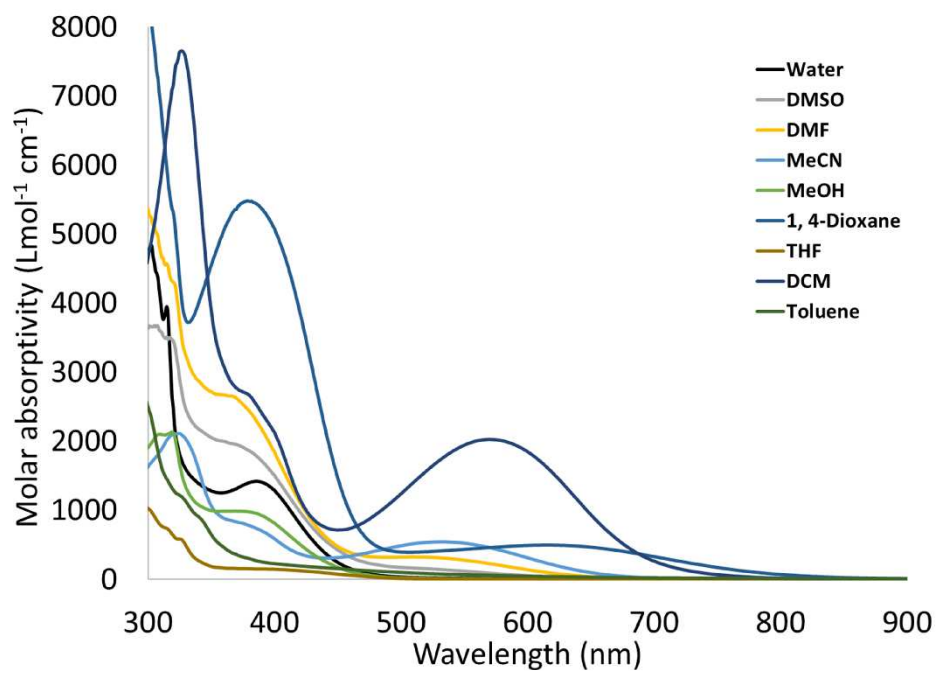

**Fig. S3** Electronic absorption spectra of complex **A** in different solvents.

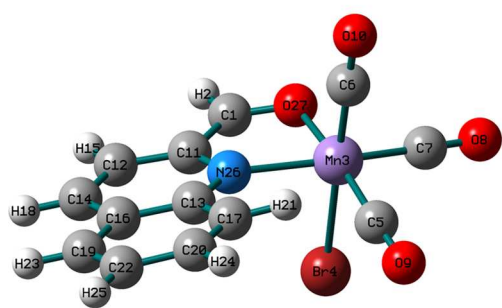

a)

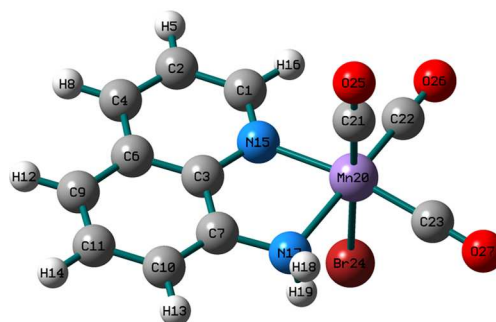

b)

Fig. S4 The local minimum structures of a) A and b) B.

**Table S2** Selected experimental bond lengths (Å) and angles (°) of complexes **A** and **B**.

|           | <b>A</b> | <b>B</b> |
|-----------|----------|----------|
| Mn–C1     | 1.802    | 1.793    |
| Mn–C2     | 1.815    | 1.809    |
| Mn–C3     | 1.827    | 1.818    |
| Mn–N1     | _____    | 2.109    |
| Mn–O      | 2.0198   | _____    |
| Mn–N10    | 2.103    | 2.053    |
| Mn–Br     | 2.584    | 2.614    |
| C1–O1     | 1.181    | 1.184    |
| C2–O2     | 1.178    | 1.179    |
| C3–O3     | 1.173    | 1.178    |
| C1–Mn–C2  | 94.19    | 93.9     |
| C1–Mn–C3  | 93.39    | 93.5     |
| C1–Mn–N1  | _____    | 94.8     |
| C1–Mn–O   | 95.6     | _____    |
| C1–Mn–N10 | _____    | 92.0     |
| C1–Mn–Br  | 177.8    | 177.9    |
| C2–Mn–C3  | 89.9     | 90.8     |
| N1–Mn–C2  | _____    | 170.4    |
| O–Mn–C2   | 170.1    | _____    |
| C2–Mn–N10 | 101.5    | 95.3     |
| C2–Mn–Br  | 83.6     | 88.0     |
| N1–Mn–C3  | _____    | 92.3     |
| O–Mn–C3   | 88.3     | _____    |
| C3–Mn–N10 | 165.59   | 171.3    |
| C3–Mn–Br  | 86.58    | 86.6     |
| N1–Mn–N10 | _____    | 80.5     |
| N10–Mn–O  | 78.9     | _____    |
| N1–Mn–Br  | _____    | 83.1     |
| O–Mn–Br   | 86.57    | _____    |
| N10–Mn–Br | 86.0     | 87.53    |

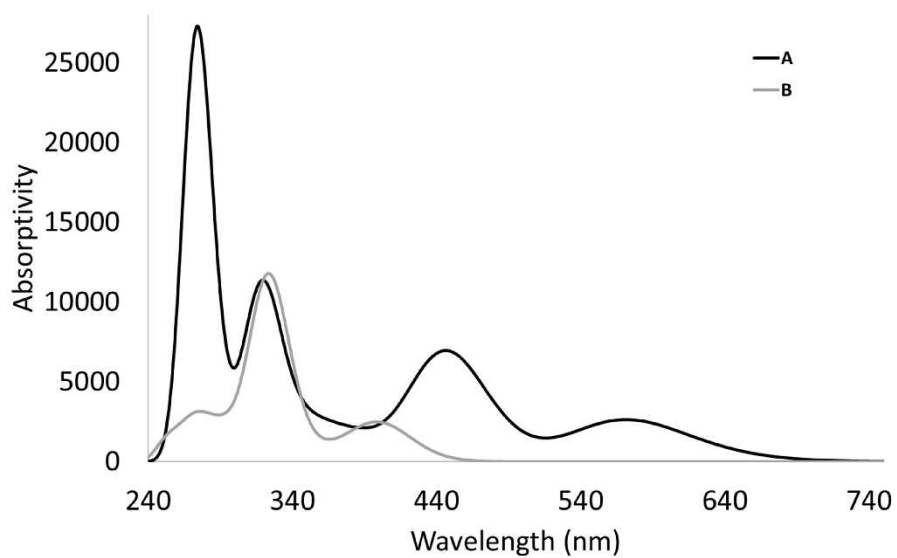

a)

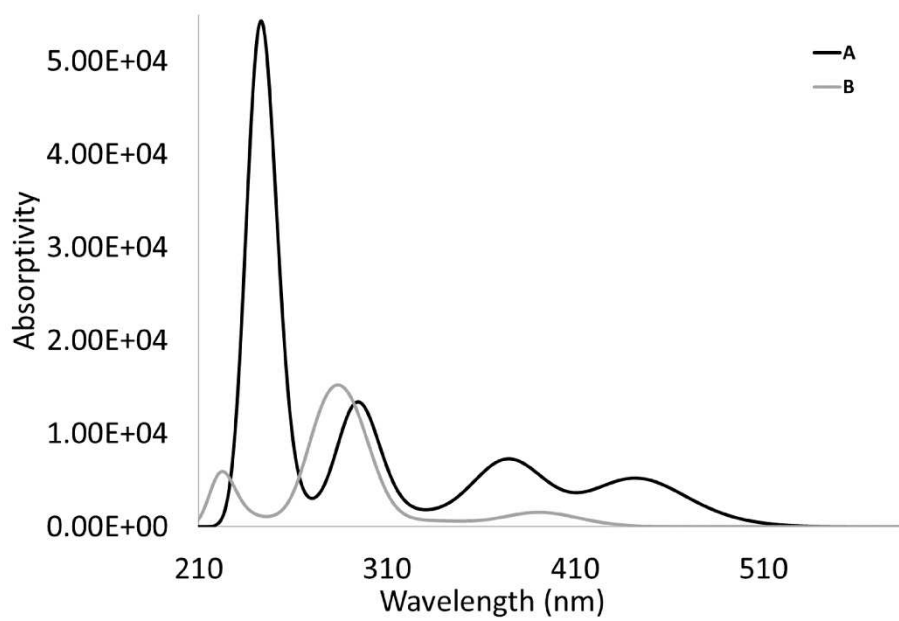

b)

**Fig. S5** TD-DFT calculated spectra of complexes **A** and **B**, calculated at **a)** B3LYP/LANL2DZ and **b)** CAM-B3LYP/LANL2DZ level of theories.

**Table S3** Computed excitation energies (eV), electronic transition configurations and oscillator strengths ( $f$ ) of compounds **A** and **B** (selected,  $f > 0.001$ )

| Energy (cm <sup>-1</sup> )     | Wavelength (nm) | $f$    | Major contributions                     |
|--------------------------------|-----------------|--------|-----------------------------------------|
| <b>• A (B3YLP/LANL2DZ)</b>     |                 |        |                                         |
| 15685                          | 637             | 0.0006 | HOMO→LUMO (97%)                         |
| 17501                          | 571             | 0.036  | HOMO-1→LUMO (98%)                       |
| 20105                          | 497             | 0.0004 | HOMO-3→LUMO (80%)                       |
| 21928                          | 456             | 0.0501 | HOMO-2→LUMO (69%)                       |
| 22853                          | 437             | 0.0519 | HOMO-4→LUMO (86%)                       |
| 28319                          | 353             | 0.0262 | HOMO-6→LUMO (84%)                       |
| 25817                          | 387             | 0.0102 | HOMO-5→LUMO (80%)                       |
| 31179                          | 320             | 0.0916 | HOMO-7→LUMO (55%)                       |
| 36433                          | 274             | 0.1797 | HOMO-2→LUMO+1 (29%)                     |
| <b>• A (CAM-B3YLP/LANL2DZ)</b> |                 |        |                                         |
| 21056                          | 474             | 0.0026 | HOMO→LUMO (86%)                         |
| 22615                          | 442             | 0.0696 | HOMO-1→LUMO (90%)                       |
| 24957                          | 400             | 0.0005 | HOMO-3→LUMO (56%)                       |
| 25142                          | 397             | 0.0026 | HOMO-3→LUMO (21%)                       |
| 26603                          | 375             | 0.0619 | HOMO-2→LUMO (54%)                       |
| 26873                          | 372             | 0.0198 | HOMO-3→LUMO+14 (21%), HOMO-2→LUMO (23%) |
| 28360                          | 352             | 0.0171 | HOMO-4→LUMO (79%)                       |
| 30387                          | 329             | 0.0039 | HOMO-3→LUMO+2 (28%)                     |
| 31417                          | 318             | 0.0069 | H-5→LUMO (69%)                          |
| 33826                          | 295             | 0.1388 | HOMO-7→LUMO (43%), HOMO-6→LUMO (33%)    |
| 40212                          | 248             | 0.0711 | HOMO→LUMO+1 (68%)                       |
| 40838                          | 244             | 0.113  | HOMO-1→LUMO+1 (27%)                     |
| 41639                          | 240             | 0.3295 | HOMO-10→LUMO (23%)                      |
| <b>• B (B3YLP/LANL2DZ)</b>     |                 |        |                                         |
| 247372                         | 404             | 0.0214 | HOMO→LUMO (45%), HOMO→LUMO+1 (26%)      |
| 25254                          | 395             | 0.0101 | HOMO-1→LUMO (35%), HOMO-1→LUMO+1 (29%)  |
| 26703                          | 374             | 0.0076 | HOMO→LUMO (47%)                         |
| 27630                          | 361             | 0.0021 | HOMO-1→LUMO (32%)                       |
| 28027                          | 356             | 0.0001 | HOMO-1→LUMO (28%)                       |
| 29608                          | 337             | 0.0042 | HOMO-3→LUMO (29%)                       |
| 30874                          | 323             | 0.1228 | HOMO-2→LUMO (67%)                       |
| 32748                          | 305             | 0.0028 | HOMO-4→LUMO (46%)                       |
| 34107                          | 293             | 0.0133 | HOMO-5→LUMO (75%)                       |
| 37197                          | 268             | 0.009  | HOMO-6→LUMO (83%)                       |
| <b>• B (CAM-B3YLP/LANL2DZ)</b> |                 |        |                                         |
| 25280                          | 395             | 0.0065 | HOMO→LUMO+2 (28%)                       |
| 25684                          | 389             | 0.0148 | HOMO-1→LUMO+2 (26%)                     |
| 28099                          | 355             | 0.0021 | HOMO-3→LUMO+2 (40%)                     |
| 28849                          | 346             | 0.0037 | HOMO-3→LUMO+3 (36%)                     |
| 30945                          | 323             | 0.0032 | HOMO-1→LUMO+3 (22%)                     |

|       |     |        |                                                                |
|-------|-----|--------|----------------------------------------------------------------|
| 32824 | 304 | 0.001  | HOMO-4→LUMO+4 (27%), HOMO-1→LUMO+4 (22%),<br>HOMO→LUMO+4 (25%) |
| 33848 | 295 | 0.0174 | HOMO-3→LUMO +4 (21%), HOMO→LUMO (23%)                          |
| 34185 | 292 | 0.1067 | HOMO→LUMO (58%)                                                |
| 35667 | 280 | 0.0475 | HOMO-2→LUMO (33%), HOMO-1→LUMO (45%)                           |
| 35983 | 277 | 0.0777 | HOMO-2→LUMO (47%), HOMO-1→LUMO (34%)                           |
| 45359 | 220 | 0.0438 | HOMO→LUMO+1 (22%)                                              |

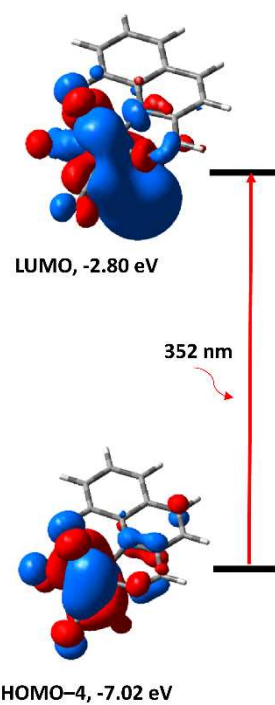

**Fig. S6** The electronic transition at 352 nm and frontier molecular orbitals of complex **A** calculated at CAM-B3LYP/LANL2DZ level of theory.

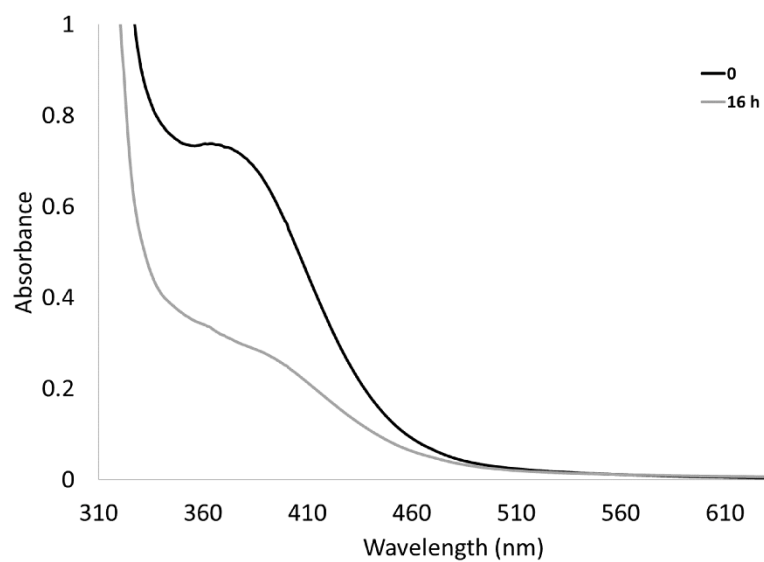

a)

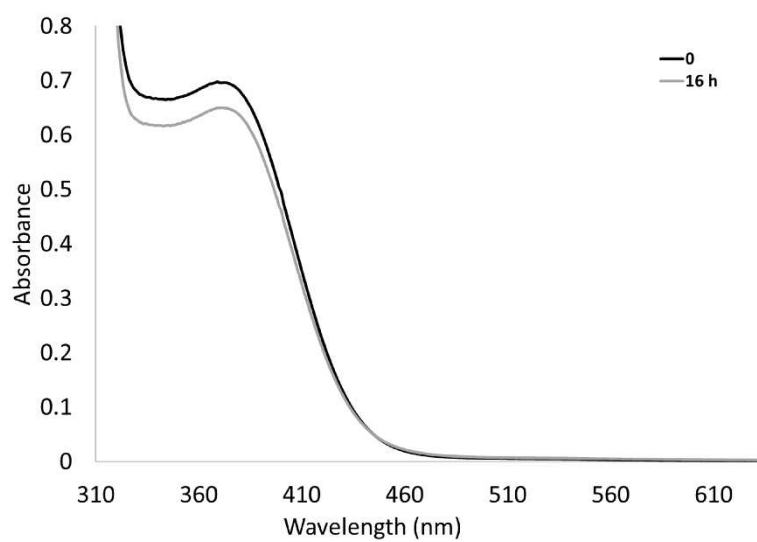

b)

**Fig. S7** Electronic absorption changes upon incubation of complexes a) **A** (0.25 mM) and b) **B** (0.24 mM) in DMSO/H<sub>2</sub>O mixture in the dark for 16 h.



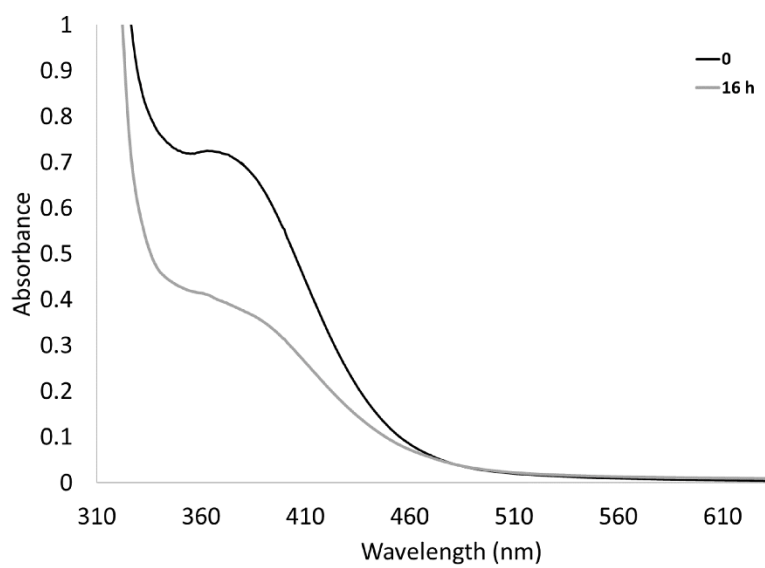

**a)**

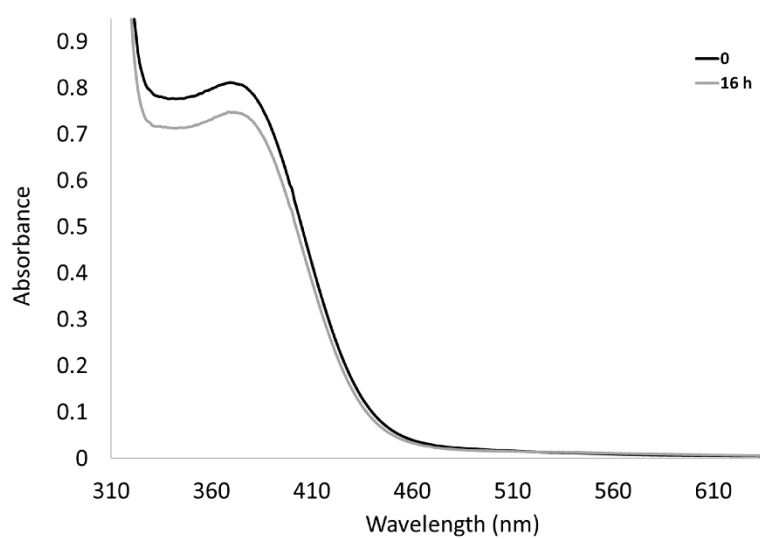

**b)**

**Fig. S8** Electronic absorption changes upon incubation of complexes a) **A** (0.25 mM) and b) **B** (0.24 mM) in an excess of sodium bromide in the dark for 16 h.

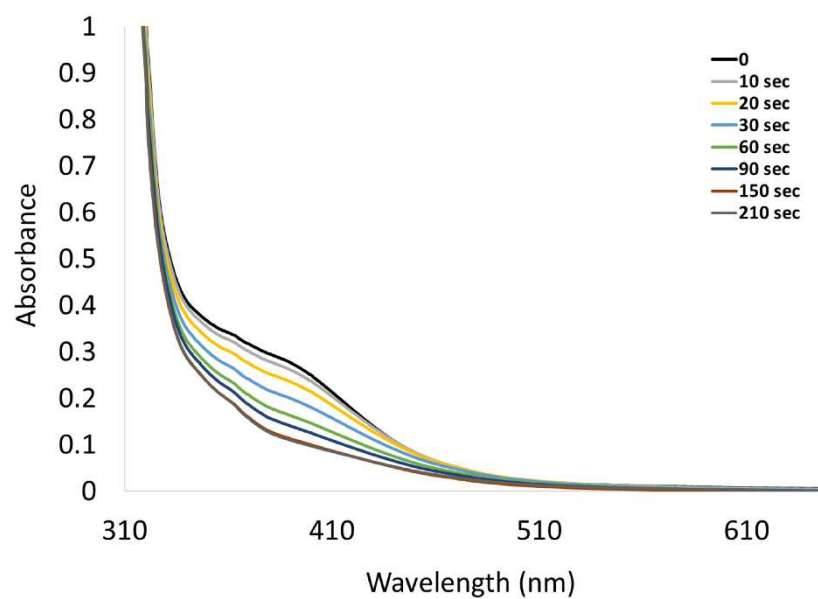

**Fig. S9** UV/Vis spectral changes of complex **A** (0.25 mM in DMSO-H<sub>2</sub>O mixture) upon photolysis at 468 nm with increasing illumination time (0–210 seconds).

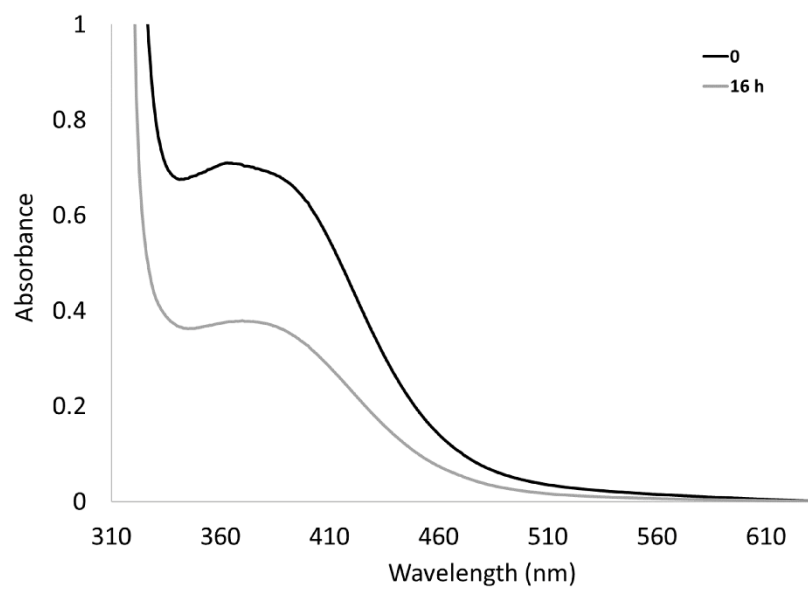

a)

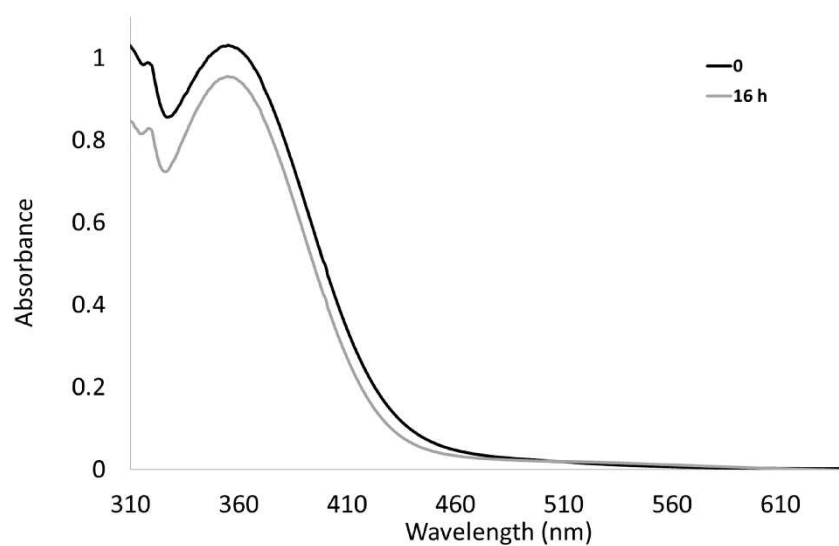

b)

**Fig. S10** Electronic absorption changes upon incubation of complexes a) **A** (0.25 mM) and b) **B** (0.24 mM) in sodium dithionite in the dark for 16 h.

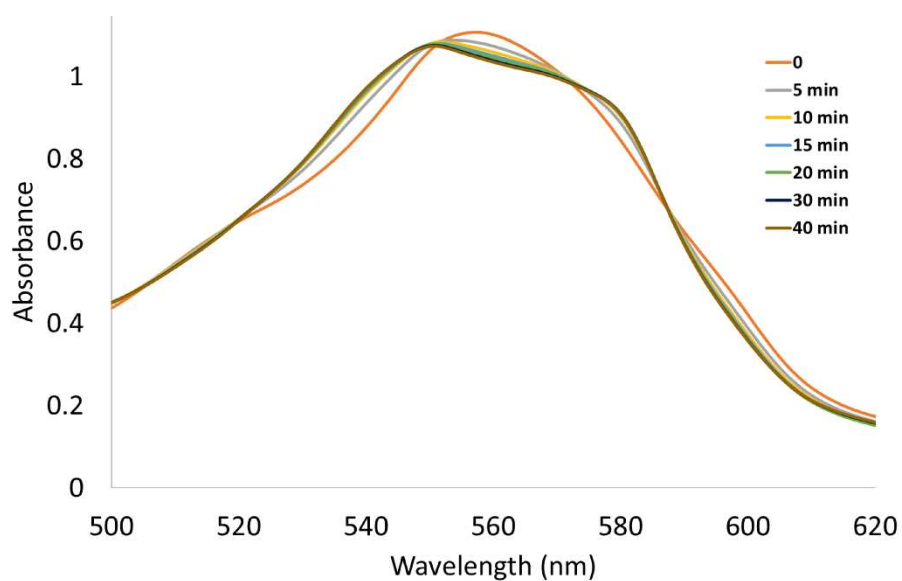

**Fig. S11** UV/vis spectral changes in the Q-band region of myoglobin (60  $\mu\text{M}$  in 0.1 PBS at pH 7.4) with sodium dithionite (10 mM) and complex **A** (10  $\mu\text{M}$ ) under a dinitrogen atmosphere upon photolysis at 468 nm.

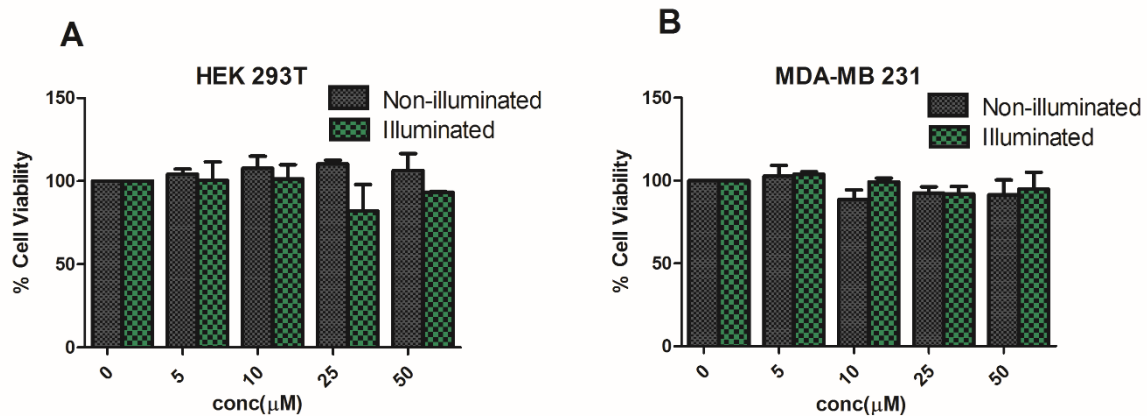

**Fig. S12** Comparison of cell viability of HEK 293T and MDA-MB-231 treated with different concentrations of compound **A** under both dark and illumination conditions.

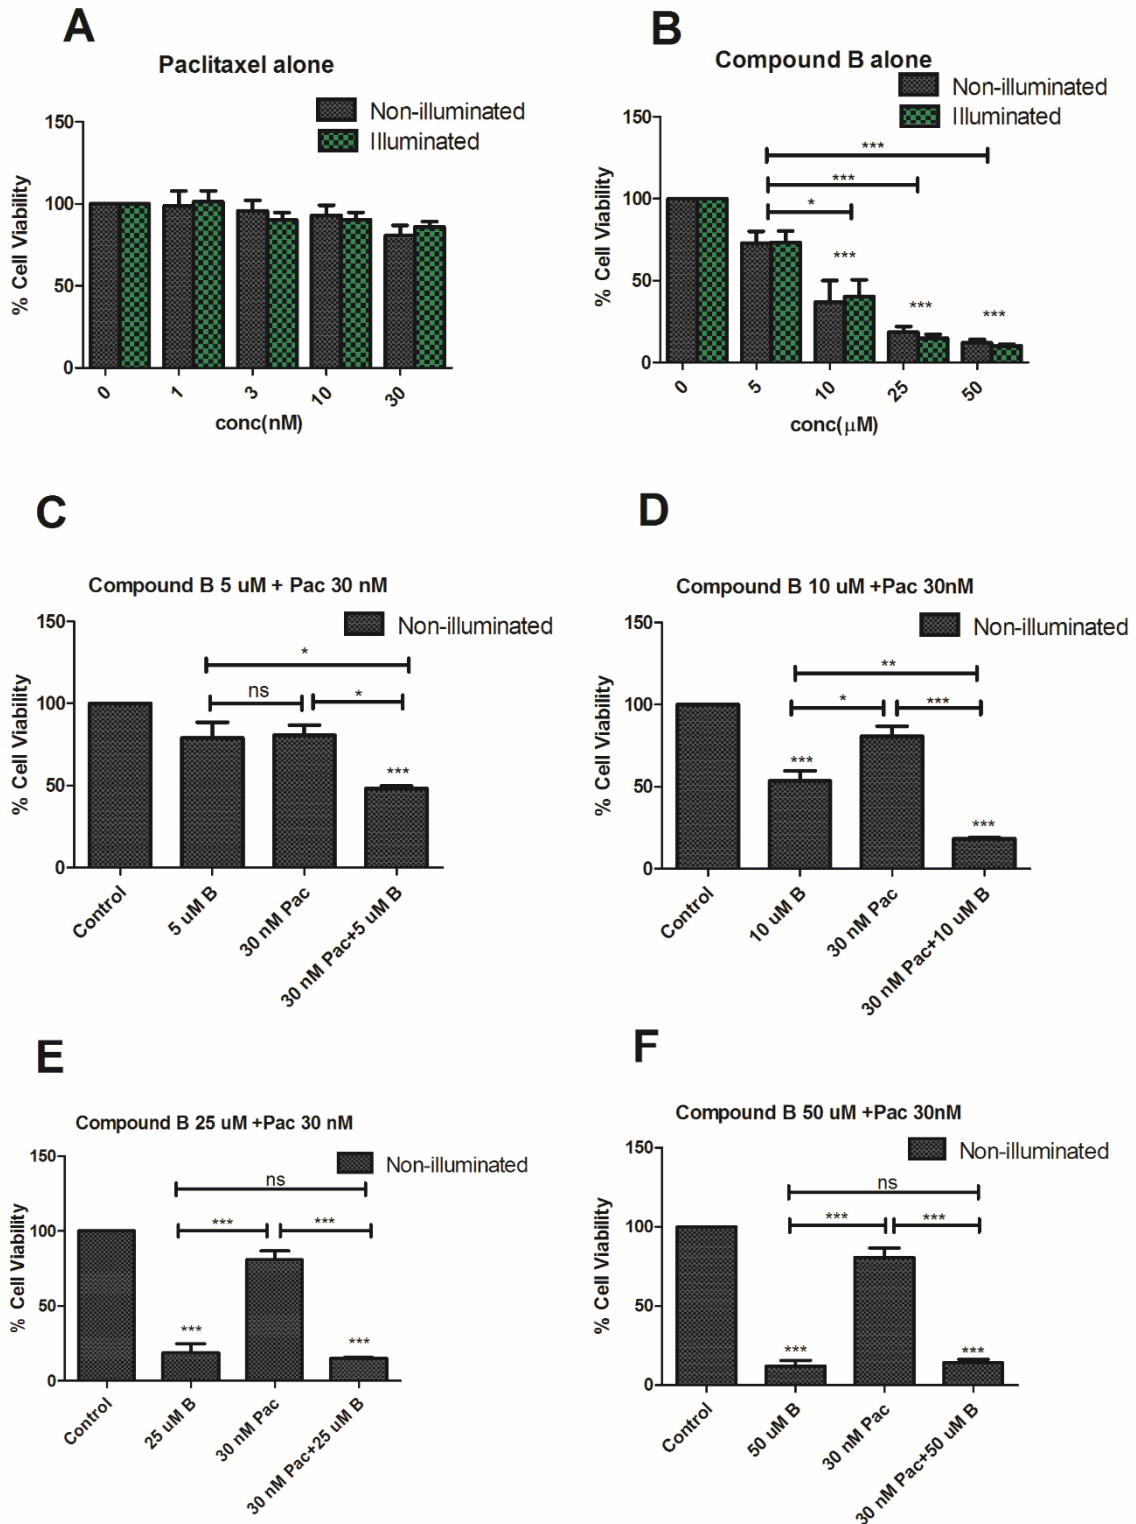

**Fig. S13** Comparison of cell viability of MDA-MB-231 treated with (A) paclitaxel alone, and (B) compound **B** alone, in different concentrations. (C, D, E, F) co-treatment of MDA-MB-231 cells with paclitaxel (30 nM) and compound **B** in different concentrations (5  $\mu$ M, 10  $\mu$ M, 25  $\mu$ M and 50  $\mu$ M) respectively, under dark conditions. Asterisks on the bar itself show results of

statistically significant difference when compared to control group, while the ones indicated by line with asterisks show statistically significant difference compared to different groups as indicated.  $P < 0.05$  was considered statistically significant with One-way ANOVA test. \*\*\*= $p < 0.001$ , \*\*= $p < 0.01$ , \*= $p < 0.05$

---

## References

1. G. M. Sheldrick, SHELXT—Integrated space-group and crystal-structure determination, *Acta Crystallogr., Sect. A: Found. Adv.*, 2015, **71**, 3-8.
2. G. M. Sheldrick, A short history of SHELX, *Acta Crystallogr., Sect. A: Found. Crystallogr.*, 2008, **64**, 112-122.
3. M. J. Frisch, G. W. Trucks, H. B. Schlegel, G. E. Scuseria, M. A. Robb, J. R. Cheeseman, V. G. Zakrzewski, J. A. Montgomery, J. C. B. R. E. Stratmann, S. Dapprich, J. M. Millam, A. D. Daniels, K. N. Kudin, M. C. Strain, O. Farkas, J. Tomasi, V. Barone, M. Cossi, R. Cammi, B. Mennucci, C. Pomelli, C. Adamo, S. Clifford, J. Ochterski, G. A. Petersson, P. Y. Ayala, Q. Cui, K. Morokuma, D. K. Malick, A. D. Rabuck, K. Raghavachari, J. B. Foresman, J. Cioslowski, J. V. Ortiz, A. G. Baboul, B. B. Stefanov, A. L. G. Liu, I. K. P. Piskorz, R. Gomperts, R. L. Martin, D. J. Fox, T. Keith, M. A. Al-Laham, C. Y. Peng, A. Nanayakkara, C. Gonzalez, M. Challacombe, P. M. W. Gill, B. G. Johnson, W. Chen, M. W. Wong, J. L. Andres, M. Head-Gordon, E. S. Replogle and J. A. Pople, *GAUSSIAN 03 (Revision A.9)*, Gaussian, Inc., Pittsburgh, 2003.
4. A. Becke, Density-functional thermochemistry. III. The role of exact exchange (1993) *J. Chem. Phys.*, **98**, 5648.
5. A. D. Becke, Density-functional exchange-energy approximation with correct asymptotic behavior, *Phys. Rev. A*, 1988, **38**, 3098.
6. P. J. Hay and W. R. Wadt, Ab initio effective core potentials for molecular calculations. Potentials for K to Au including the outermost core orbitals, *J. Chem. Phys.*, 1985, **82**, 299-310.
7. P. J. Hay and W. R. Wadt, Ab initio effective core potentials for molecular calculations. Potentials for the transition metal atoms Sc to Hg, *J. Chem. Phys.*, 1985, **82**, 270-283.
8. T. Yanai, D. P. Tew and N. C. Handy, A new hybrid exchange–correlation functional using the Coulomb-attenuating method (CAM-B3LYP), *Chem. Phys. Lett.*, 2004, **393**, 51-57.
9. A. V. Marenich, C. J. Cramer and D. G. Truhlar, Universal solvation model based on solute electron density and on a continuum model of the solvent defined by the bulk dielectric constant and atomic surface tensions, *J. Phys. Chem. B*, 2009, **113**, 6378-6396.
10. A. Frisch, A. B. Nielson and A. J. Holder, Gaussview User Manual, Gaussian, Inc., Pittsburgh, PA, 2000, .
11. S. McLean, B. E. Mann and R. K. Poole, Sulfite species enhance carbon monoxide release from CO-releasing molecules: implications for the deoxymyoglobin assay of activity, *Analytical biochemistry*, 2012, **427**, 36-40.
12. A. J. Atkin, J. M. Lynam, B. E. Moulton, P. Sawle, R. Motterlini, N. M. Boyle, M. T. Pryce and I. J. Fairlamb, Modification of the deoxy-myoglobin/carbonmonoxy-myoglobin UV-vis assay for reliable determination of CO-release rates from organometallic carbonyl complexes, *Dalton Trans.*, 2011, **40**, 5755-5761.
